# Supplementary material for: Food Insecurity in the Households of Polish Elderly: Diversity in the Perception of Its Causes by Demographic and Socioeconomic Characteristics
Source: MDPI journal article supplement (doi:10.3390/foods11203222), 2022-10-15
Supplement: s1 [file foods-1908440-supplementary.pdf › foods-1908440-supplementary.pdf]

**Table S1.** Importance of "economic-social" and "spatial-health" reasons for food insecurity according to selected demographic characteristics and socioeconomic status of the study sample.

| Demographic characteristics and socioeconomic status | Total sample |       | Reasons for food insecurity            |      |     |      |                                       |      |     |      |
|------------------------------------------------------|--------------|-------|----------------------------------------|------|-----|------|---------------------------------------|------|-----|------|
|                                                      |              |       | „economic-social” reasons <sup>a</sup> |      |     |      | „spatial-health” reasons <sup>b</sup> |      |     |      |
|                                                      |              |       | high                                   |      | low |      | high                                  |      | low |      |
|                                                      | N            | %     | N                                      | %    | N   | %    | N                                     | %    | N   | %    |
| Total sample                                         | 760          | 100.0 | 677                                    | 89.1 | 83  | 10.9 | 245                                   | 32.2 | 515 | 67.8 |
| Gender ( $p \geq 0.05$ )                             |              |       |                                        |      |     |      |                                       |      |     |      |
| Women                                                | 527          | 69.3  | 470                                    | 89.2 | 57  | 10.8 | 164                                   | 31.1 | 363 | 68.9 |
| Men                                                  | 233          | 30.7  | 207                                    | 88.8 | 26  | 11.2 | 81                                    | 34.7 | 152 | 65.3 |
| Age ( $p \geq 0.05$ )                                |              |       |                                        |      |     |      |                                       |      |     |      |
| 65-74 years                                          | 531          | 69.9  | 490                                    | 92.3 | 41  | 7.7  | 142                                   | 26.7 | 389 | 73.3 |
| 75 years and older                                   | 229          | 30.1  | 187                                    | 81.7 | 42  | 18.3 | 103                                   | 44.9 | 126 | 55.1 |
| Place of residence ( $p < 0.05$ ) <sup>a,b</sup>     |              |       |                                        |      |     |      |                                       |      |     |      |
| Village                                              | 244          | 32.1  | 202                                    | 82.7 | 42  | 17.3 | 115                                   | 47.1 | 129 | 52.9 |
| A town with less than 100,000 inhabitants            | 122          | 16.1  | 112                                    | 91.8 | 10  | 8.2  | 33                                    | 27.0 | 89  | 73.0 |
| A city with over 100,000 inhabitants                 | 394          | 51.8  | 363                                    | 92.1 | 31  | 7.9  | 97                                    | 24.6 | 297 | 75.4 |
| Region ( $p \geq 0.05$ )                             |              |       |                                        |      |     |      |                                       |      |     |      |
| Świętokrzyskie                                       | 443          | 58.3  | 378                                    | 85.3 | 65  | 14.7 | 171                                   | 38.6 | 272 | 61.4 |
| Śląskie                                              | 317          | 41.7  | 299                                    | 94.3 | 18  | 5.7  | 74                                    | 23.3 | 243 | 76.7 |
| SES index ( $p < 0.05$ ) <sup>a,b</sup>              |              |       |                                        |      |     |      |                                       |      |     |      |
| Low                                                  | 225          | 29.6  | 208                                    | 92.4 | 17  | 7.6  | 36                                    | 16.0 | 189 | 84.0 |
| Average                                              | 389          | 51.2  | 339                                    | 87.1 | 50  | 12.9 | 85                                    | 21.9 | 304 | 78.1 |
| High                                                 | 146          | 19.2  | 130                                    | 89.0 | 16  | 11.0 | 89                                    | 61.0 | 57  | 39.0 |

<sup>a,b</sup> Significant differences after accounting for demographic characteristics and socioeconomic status - Chi-square test,  $p < 0.05$ .
